# Supplementary material
Source: PubMed Central journal article supplement (PMC7091491)
Supplement: NIHMS1572694-supplement-1.pdf [file NIHMS1572694-supplement-1.pdf]

# Hinge-linker elements in the AAA+ protein unfoldase ClpX mediate intersubunit communication, assembly, and mechanical activity

Tristan A. Bell<sup>1</sup>, Tania A. Baker<sup>1,2</sup>, and Robert T. Sauer<sup>1,\*</sup>

<sup>1</sup>Department of Biology and <sup>2</sup>Howard Hughes Medical Institute, Massachusetts Institute of Technology, Cambridge, MA 02139

**Running Title:** *Structural and functional roles of ClpX hinge-linkers*

\* **Correspondence:** bobsauer@mit.edu

**Keywords:** ClpXP, AAA+ enzymes, ATP-dependent protein unfolding, protein degradation

This document is the Accepted Manuscript version of a Published Work that appeared in final form in *Biochemistry*, copyright © American Chemical Society after peer review and technical editing by the publisher. To access the final edited and published work see <http://pubs.acs.org/page/policy/articlesonrequest/index.html>.

## *Supplementary Information*

**Supplementary Figure 1** – ATP hydrolysis by linker-deletion pseudo-hexamers at different concentrations of ClpP and Arc-st11-ssrA substrate

**Supplementary Figure 2** – Effect of ClpP concentration on Arc-st11-ssrA degradation rate

## Linker-Deletion Pseudo-hexamer

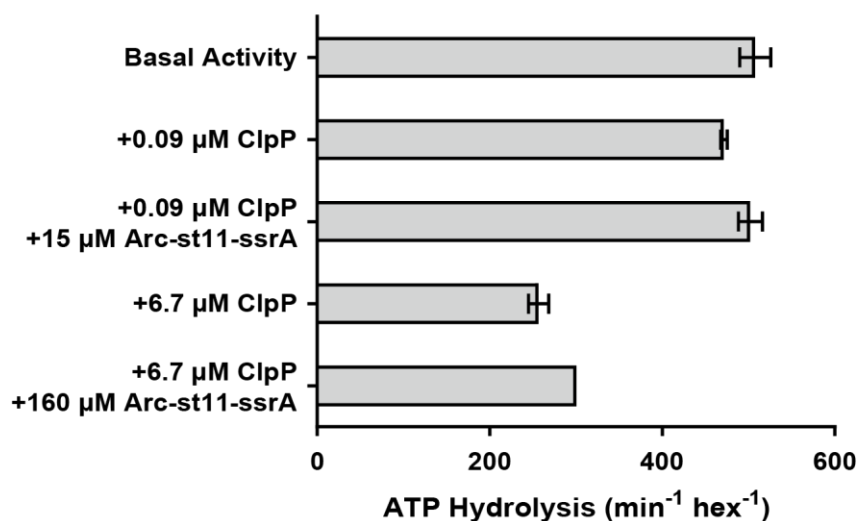

**Supplementary Figure 1** – ATP hydrolysis by linker-deletion pseudo-hexamer (0.03 μM) under the conditions used in Fig. 2B for wild-type and G12-insertion pseudo-hexamers (0.09 μM ClpP<sub>14</sub>, 15 μM Arc-st11-ssrA monomeric) and for linker-deletion pseudo-hexamer (6.7 μM ClpP<sub>14</sub>, 160 μM Arc-st11-ssrA monomeric). Experimental values are averages of three independent replicates ± SD.

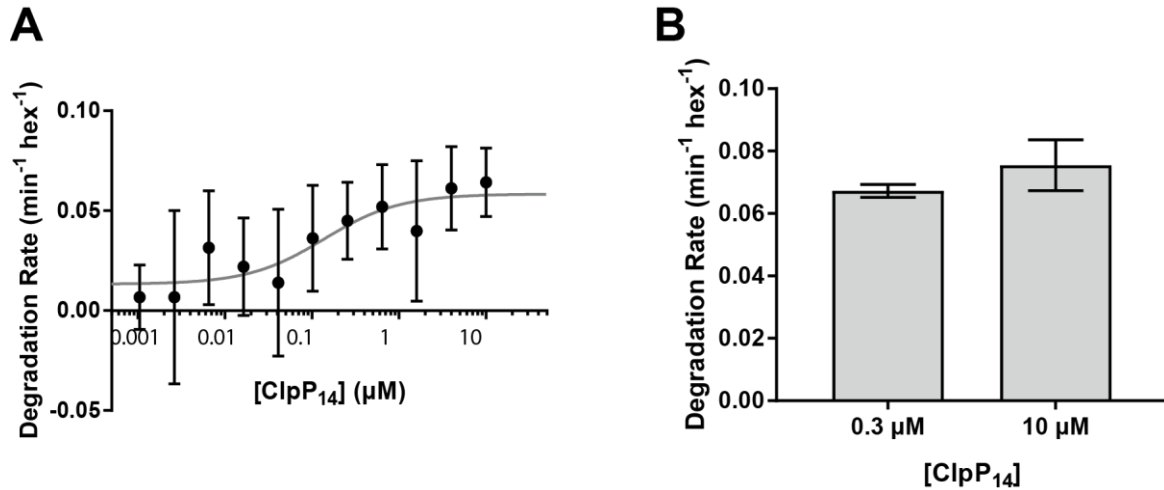

**Supplementary Figure 2** – Effect of ClpP concentration of Arc-st11-ssrA degradation rate. **(A)** Degradation of 15 μM Arc-st11-ssrA (monomeric) by 0.1 μM linker-deletion pseudo-hexamer in the presence of increasing amounts of ClpP<sub>14</sub>. Experimental values are averages of three independent replicates ± SD. **(B)** Comparison of degradation rate of 15 μM Arc-st11-ssrA (monomeric) by 0.1 μM linker-deletion pseudo-hexamer in the presence of 0.3 μM or 10 μM ClpP<sub>14</sub>. Experimental values are averages of three sets of three independent replicates ± SEM.
